# Supplementary material for: Time-series RNA-Seq and data-driven network inference unveil dynamics of cell activation, survival and crosstalk in Chronic Lymphocytic Leukaemia in vitro models
Source: Research Square preprint supplement (doi:10.21203/rs.3.rs-6479966/v1), 2025-05-07

# **Supplementary Material for Time-series RNA-Seq and data-driven network inference unveil dynamics of cell activation, survival and crosstalk in Chronic Lymphocytic Leukaemia *in vitro* models**

Malvina Marku, Hugo Chenel, Julie Bordenave, Marcelo Hurtado, Marcin Domagala, Flavien Raynal, Mary Poupot, Loïc Ysebaert, Andrei Zinovyev and Vera Pancaldi

- 1 **1. Microscopy images of the *in vitro* culture**
- 2 **2. Supplementary analysis**
- 3 **A. Principal Component Analysis results.**
- 4 **B. Ligand-receptor analysis.**
- 5 **C. Independent Component Analysis (ICA).**
- 6 **3. Network analysis**

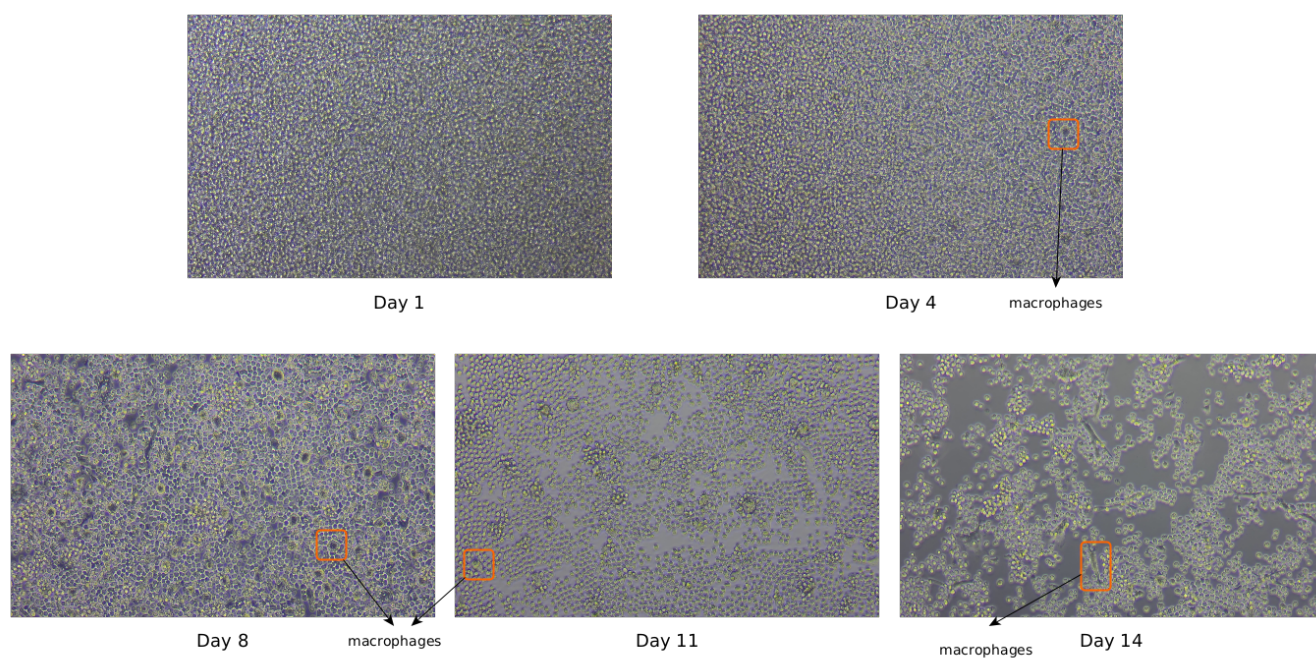

**Figure S1.** Microscopy images of the *in vitro* culture. After D8, the formation of macrophages is complete.

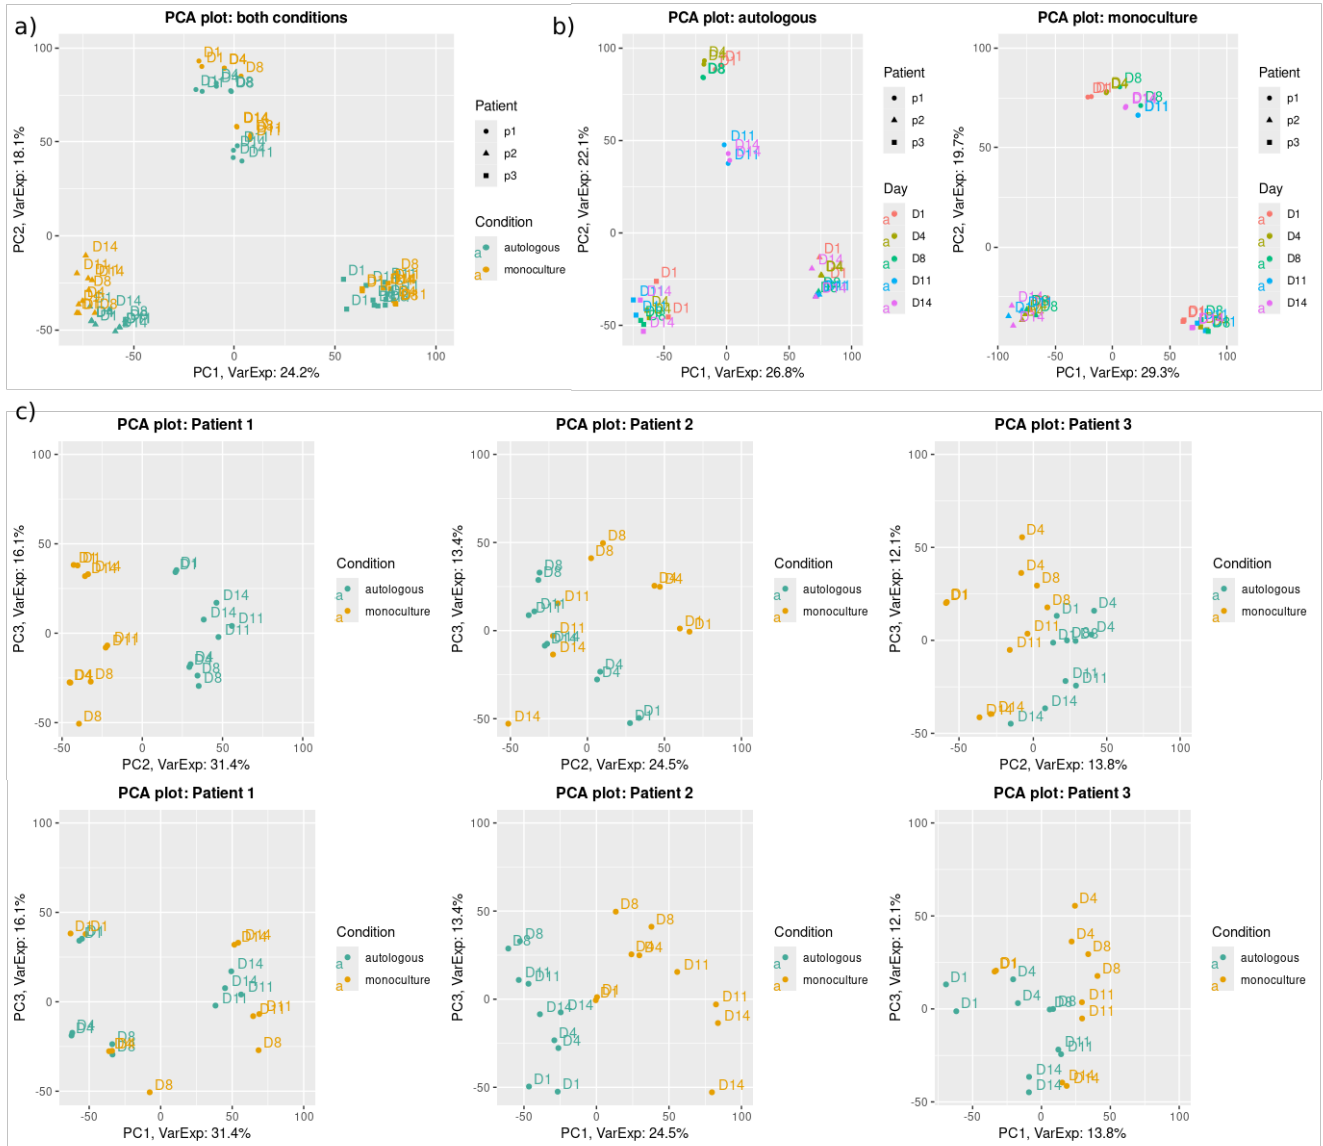

**Figure S2.** Principal Component Analysis of autologous and monoculture, showing the high heterogeneity between patients.

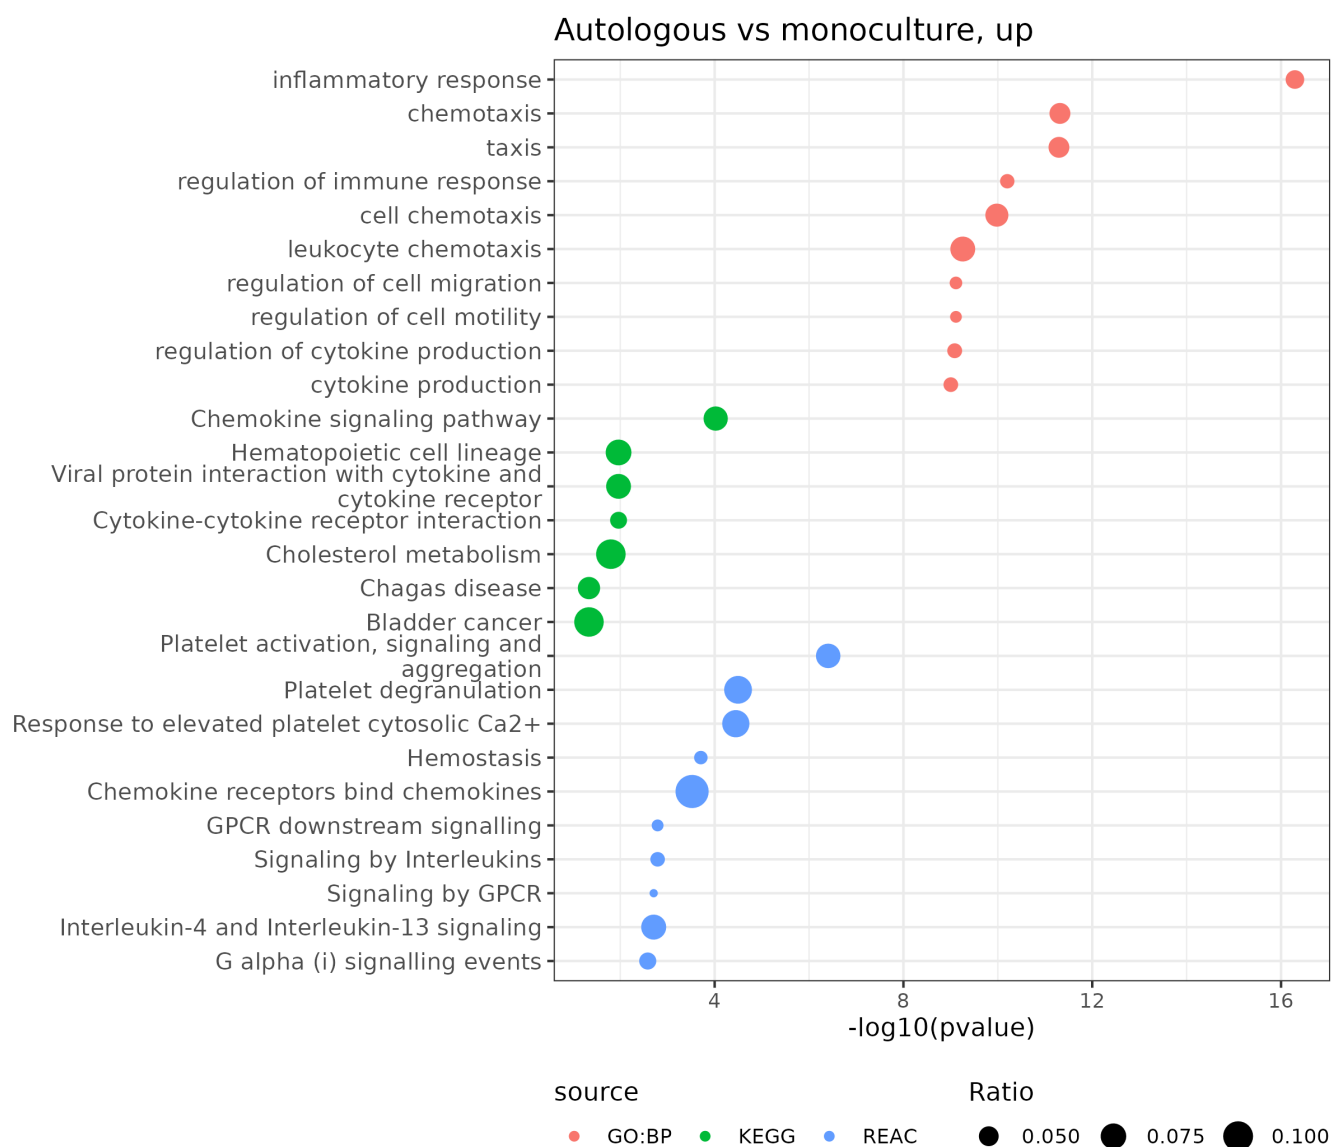

**Figure S3.** Pathway enrichment analysis of the up-regulated genes in the autologous vs monoculture.

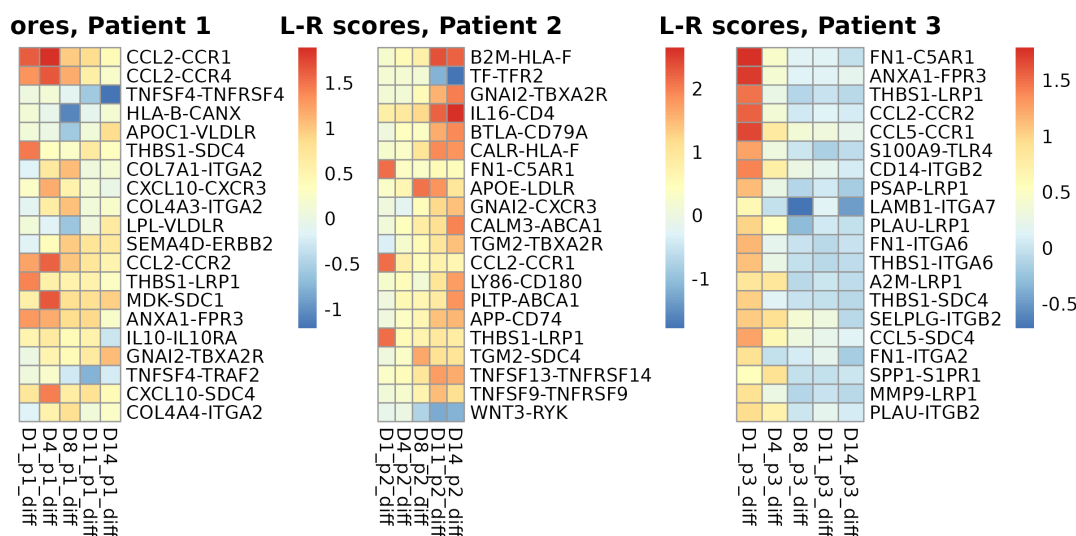

(a) Top 20 LR pairs for each patient, selected based on the variance of LR scores.

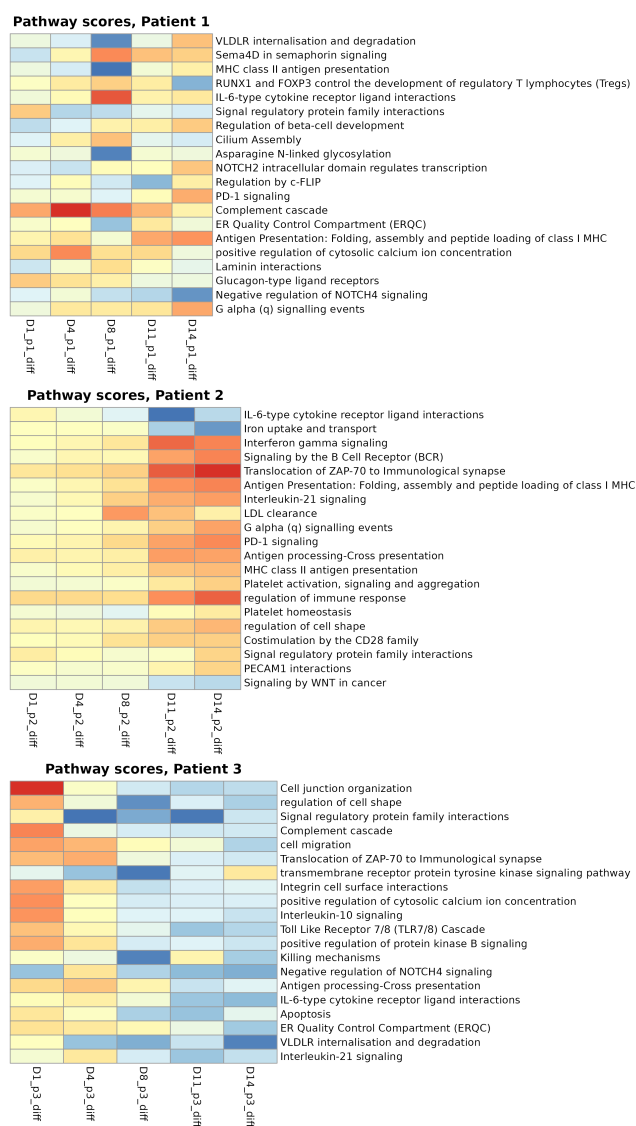

(b) Top 20 pathways for each patient, selected based on the variance of pathway scores.

Figure S4

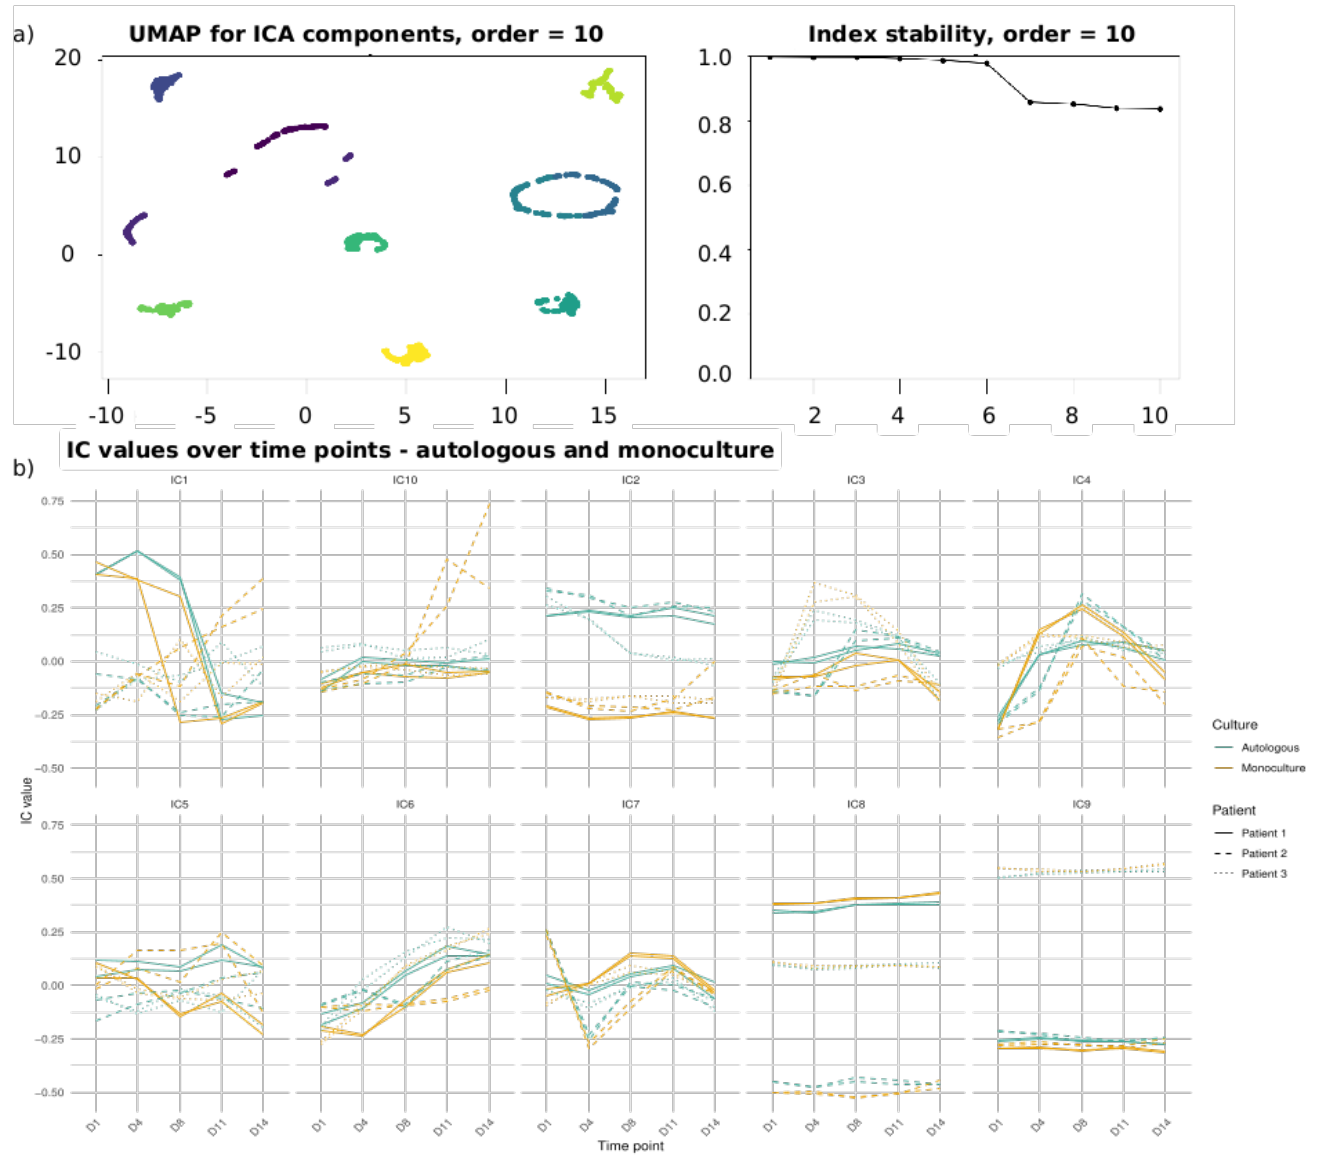

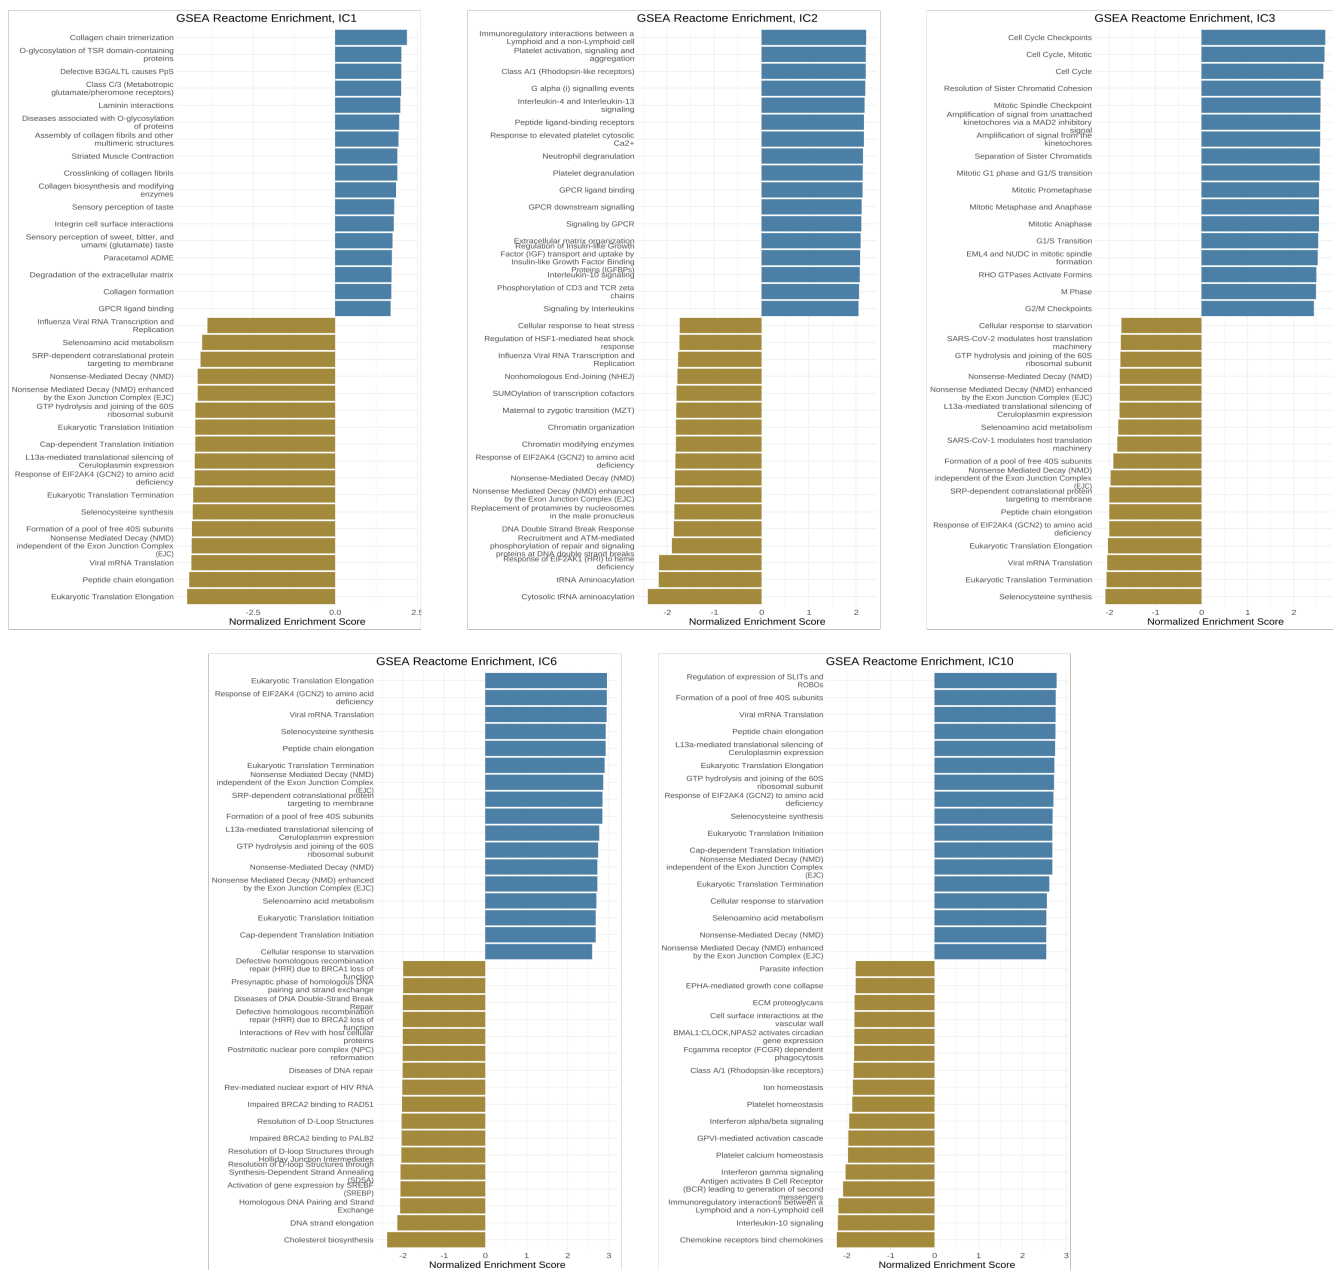

**Figure S6.** Gene set enrichment analysis on the independent components.



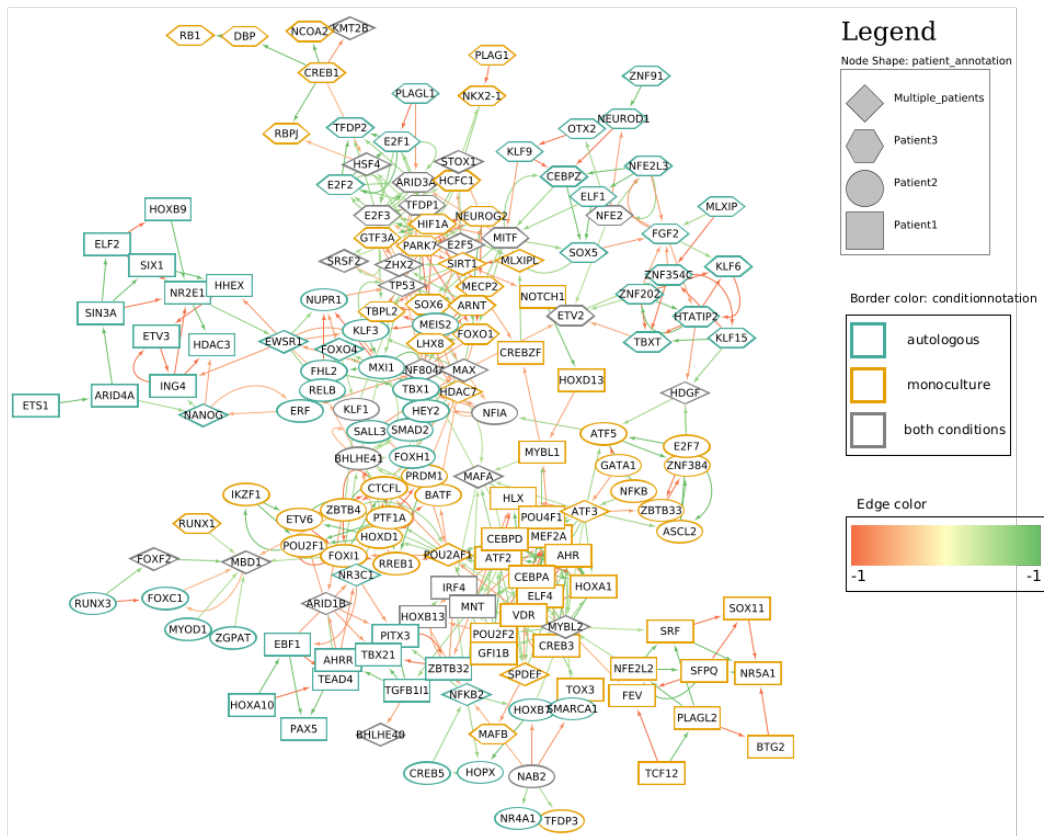

(a) TF-TF network with nodes coloured by condition.

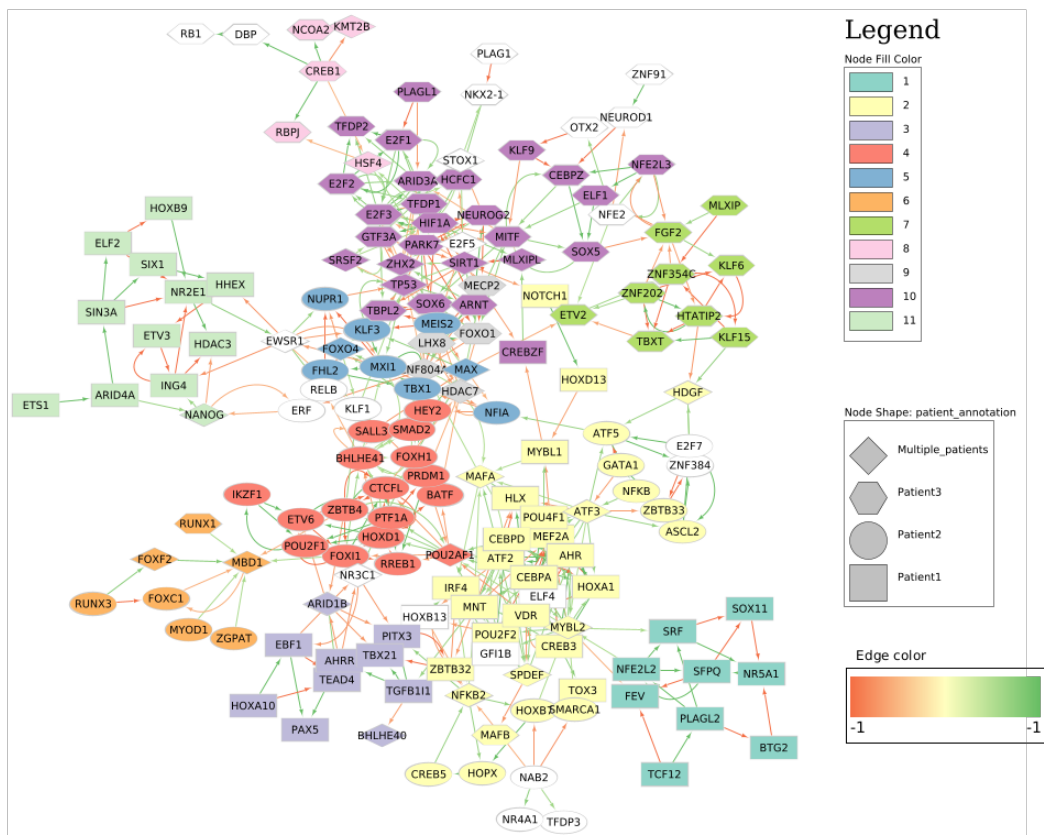

(b) TF-TF network with nodes coloured by module.

Figure S7



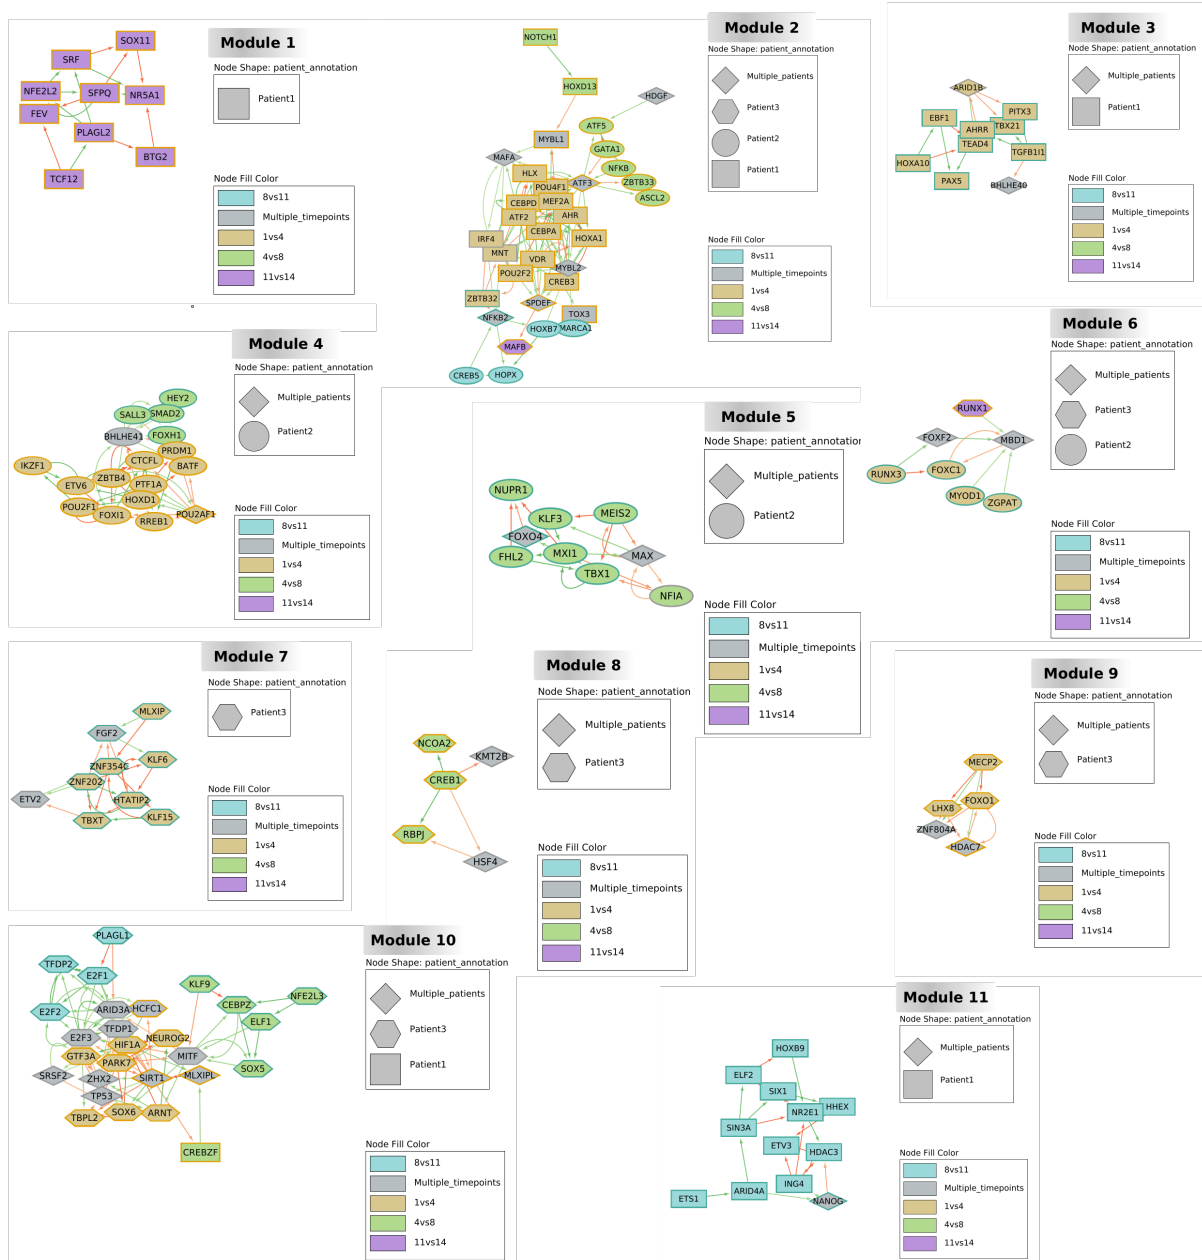

**Figure S8.** Annotation of modules with nodes' features.

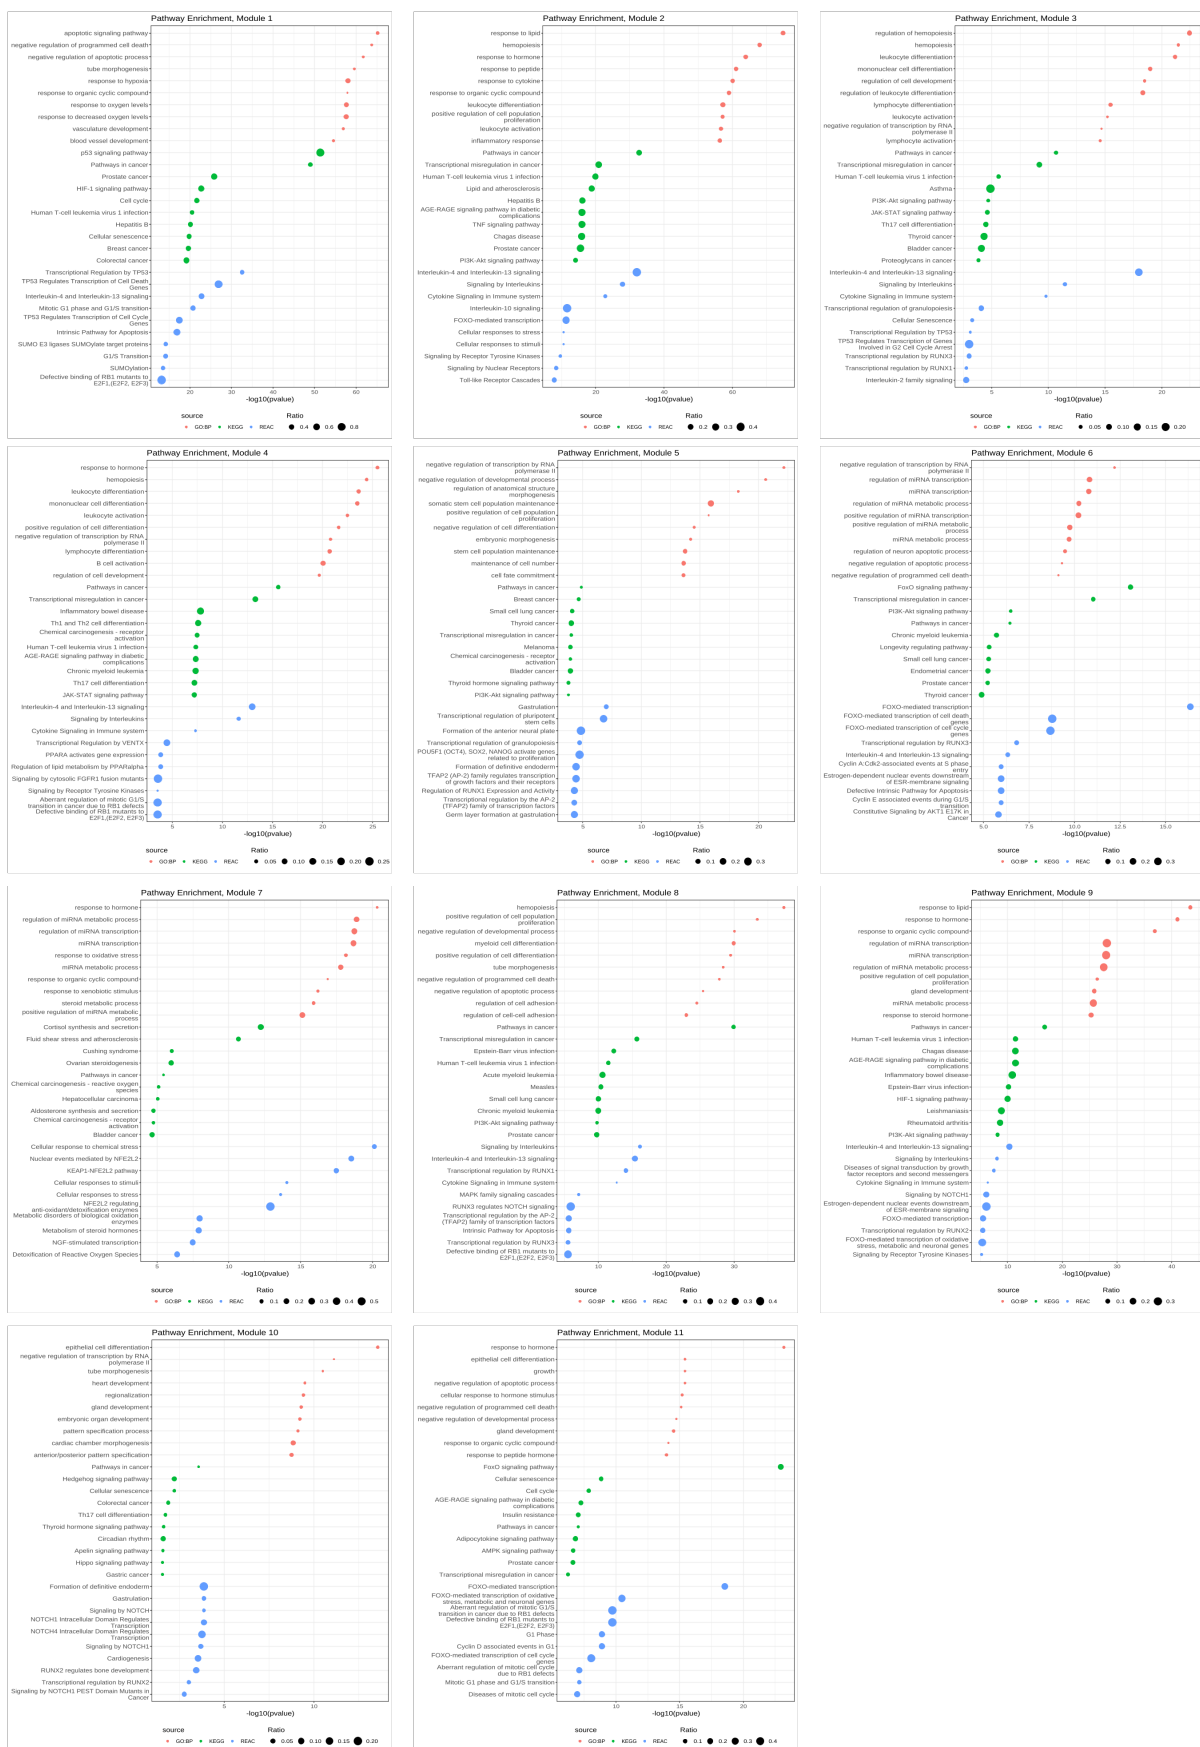

Supplement: Supplementary file 1 [file 1f29b5c14035c7ef22dbcc22.pdf]
